# Supplementary material
Source: PubMed Central journal article supplement (PMC5416810)
Supplement: NIHMS861317-supplement-2.pdf [file NIHMS861317-supplement-2.pdf]

**Supplementary Table 1. Annexin A6 MO-containing sensory neurons exhibit very short to no neuronal projections.**

| Control MO      |                  |                                         |                                                 |                                                                 | Annexin A6 MO   |                  |                                         |                                                 |                                                                 |
|-----------------|------------------|-----------------------------------------|-------------------------------------------------|-----------------------------------------------------------------|-----------------|------------------|-----------------------------------------|-------------------------------------------------|-----------------------------------------------------------------|
| <u>Ganglion</u> | <u>Section #</u> | <u>Number of electroporated neurons</u> | <u>Number of electroporated bipolar neurons</u> | <u>Number of electroporated neurons with short/no processes</u> | <u>Ganglion</u> | <u>Section #</u> | <u>Number of electroporated neurons</u> | <u>Number of electroporated bipolar neurons</u> | <u>Number of electroporated neurons with short/no processes</u> |
| 1               | 1                | 40                                      | 40                                              | 0                                                               | 1               | 1                | 25                                      | 0                                               | 25                                                              |
|                 | 2                | 22                                      | 22                                              | 0                                                               |                 | 2                | 28                                      | 0                                               | 28                                                              |
|                 | 3                | 15                                      | 15                                              | 0                                                               |                 | 3                | 29                                      | 3                                               | 26                                                              |
| 2               | 1                | 29                                      | 29                                              | 0                                                               |                 | 4                | 24                                      | 0                                               | 24                                                              |
|                 | 2                | 20                                      | 20                                              | 0                                                               |                 | 5                | 20                                      | 1                                               | 19                                                              |
|                 | 3                | 25                                      | 25                                              | 0                                                               | 2               | 1                | 6                                       | 0                                               | 6                                                               |
|                 | 4                | 25                                      | 25                                              | 0                                                               |                 | 2                | 7                                       | 0                                               | 7                                                               |
| 3               | 1                | 18                                      | 18                                              | 0                                                               |                 | 3                | 11                                      | 1                                               | 10                                                              |
|                 | 2                | 23                                      | 23                                              | 0                                                               |                 | 4                | 13                                      | 1                                               | 12                                                              |
|                 | 3                | 33                                      | 33                                              | 0                                                               | 5               | 25               | 4                                       | 21                                              |                                                                 |
|                 | 4                | 29                                      | 29                                              | 0                                                               | 6               | 29               | 3                                       | 26                                              |                                                                 |
|                 | 5                | 40                                      | 40                                              | 0                                                               | 7               | 20               | 1                                       | 19                                              |                                                                 |
|                 | 6                | 24                                      | 24                                              | 0                                                               | 8               | 20               | 2                                       | 18                                              |                                                                 |
| 4               | 1                | 21                                      | 21                                              | 0                                                               | 3               | 9                | 25                                      | 1                                               | 24                                                              |
|                 | 2                | 19                                      | 19                                              | 0                                                               |                 | 1                | 30                                      | 2                                               | 28                                                              |
|                 | 3                | 25                                      | 25                                              | 0                                                               |                 | 2                | 26                                      | 1                                               | 25                                                              |
|                 | 4                | 32                                      | 32                                              | 0                                                               |                 | 3                | 12                                      | 0                                               | 12                                                              |
|                 | 5                | 30                                      | 30                                              | 0                                                               |                 | 4                | 12                                      | 0                                               | 12                                                              |
| 5               | 1                | 22                                      | 22                                              | 0                                                               | 4               | 5                | 10                                      | 0                                               | 10                                                              |
|                 | 2                | 31                                      | 31                                              | 0                                                               |                 | 1                | 22                                      | 1                                               | 21                                                              |
|                 | 3                | 28                                      | 28                                              | 0                                                               |                 | 2                | 24                                      | 0                                               | 24                                                              |
|                 | 4                | 36                                      | 36                                              | 0                                                               |                 | 3                | 25                                      | 0                                               | 25                                                              |
|                 | 5                | 29                                      | 29                                              | 0                                                               | 4               | 20               | 0                                       | 20                                              |                                                                 |
|                 |                  |                                         |                                                 |                                                                 | 5               | 1                | 19                                      | 0                                               | 19                                                              |

|                                                                   |     |          |      |   |   |     |       |       |    |
|-------------------------------------------------------------------|-----|----------|------|---|---|-----|-------|-------|----|
| 6                                                                 | 1   | 27       | 27   | 0 |   | 2   | 23    | 0     | 23 |
|                                                                   | 2   | 25       | 25   | 0 |   | 3   | 25    | 2     | 23 |
|                                                                   | 3   | 30       | 30   | 0 |   | 4   | 30    | 1     | 29 |
|                                                                   | 4   | 18       | 18   | 0 |   | 5   | 32    | 0     | 32 |
|                                                                   | 5   | 19       | 19   | 0 |   | 6   | 36    | 3     | 33 |
| 7                                                                 | 1   | 18       | 18   | 0 | 6 | 1   | 21    | 3     | 18 |
|                                                                   | 2   | 17       | 17   | 0 |   | 2   | 20    | 1     | 19 |
|                                                                   | 3   | 23       | 23   | 0 |   | 3   | 15    | 1     | 14 |
|                                                                   | 4   | 24       | 24   | 0 |   | 4   | 7     | 0     | 7  |
|                                                                   | 5   | 19       | 19   | 0 |   | 5   | 10    | 1     | 9  |
|                                                                   |     |          |      |   |   | 6   | 11    | 0     | 11 |
|                                                                   |     |          |      |   | 7 | 1   | 11    | 0     | 11 |
|                                                                   |     |          |      |   |   | 2   | 13    | 0     | 13 |
|                                                                   |     |          |      |   |   | 3   | 12    | 2     | 10 |
|                                                                   |     |          |      |   |   | 4   | 12    | 0     | 12 |
|                                                                   |     |          |      |   |   | 5   | 10    | 0     | 10 |
|                                                                   |     |          |      |   | 6 | 9   | 0     | 9     |    |
| Number of neurons examined                                        | 836 | 836      | 0    |   |   | 779 | 35    | 744   |    |
| Percent of MO-containing neurons with two or short/no protrusions |     | 100      | 0    |   |   |     | 4.49  | 95.5  |    |
| Standard Deviation                                                |     | 6.41     | 0.00 |   |   |     | 1.11  | 7.56  |    |
| SEM                                                               |     | 0.222    |      |   |   |     | 0.187 | 0.277 |    |
| Unpaired student's t test                                         |     | 7.45E-22 |      |   |   |     |       |       |    |
