# Supplementary material
Source: PubMed Central journal article supplement (PMC5416810)
Supplement: NIHMS861317-supplement-4.pdf [file NIHMS861317-supplement-4.pdf]

**Supplementary Table 3. Sensory neurons with reduced Annexin A6 fail to innervate their target tissues due to the absence of a bipolar morphology.**

| Control MO      |                  |                                         |                                                 |                                                                 | Annexin A6 MO   |                  |                                         |                                                 |                                                                 |
|-----------------|------------------|-----------------------------------------|-------------------------------------------------|-----------------------------------------------------------------|-----------------|------------------|-----------------------------------------|-------------------------------------------------|-----------------------------------------------------------------|
| <u>Ganglion</u> | <u>Section #</u> | <u>Number of electroporated neurons</u> | <u>Number of electroporated bipolar neurons</u> | <u>Number of electroporated neurons with short/no processes</u> | <u>Ganglion</u> | <u>Section #</u> | <u>Number of electroporated neurons</u> | <u>Number of electroporated bipolar neurons</u> | <u>Number of electroporated neurons with short/no processes</u> |
| 1               | 1                | 6                                       | 6                                               | 0                                                               | 1               | 1                | 5                                       | 0                                               | 5                                                               |
|                 | 2                | 5                                       | 5                                               | 0                                                               |                 | 2                | 4                                       | 0                                               | 4                                                               |
|                 | 3                | 3                                       | 3                                               | 0                                                               |                 | 3                | 5                                       | 1                                               | 4                                                               |
| 2               | 1                | 5                                       | 5                                               | 0                                                               | 2               | 4                | 3                                       | 0                                               | 3                                                               |
|                 | 2                | 7                                       | 7                                               | 0                                                               |                 | 5                | 3                                       | 1                                               | 2                                                               |
|                 | 3                | 4                                       | 4                                               | 0                                                               |                 | 1                | 6                                       | 0                                               | 6                                                               |
|                 | 4                | 5                                       | 5                                               | 0                                                               |                 | 2                | 7                                       | 0                                               | 7                                                               |
| 3               | 1                | 2                                       | 2                                               | 0                                                               | 3               | 3                | 5                                       | 1                                               | 4                                                               |
|                 | 2                | 3                                       | 3                                               | 0                                                               |                 | 4                | 6                                       | 0                                               | 6                                                               |
|                 | 3                | 3                                       | 3                                               | 0                                                               |                 | 5                | 4                                       | 0                                               | 4                                                               |
|                 | 4                | 4                                       | 4                                               | 0                                                               |                 | 6                | 4                                       | 0                                               | 4                                                               |
|                 | 5                | 2                                       | 2                                               | 0                                                               |                 | 1                | 4                                       | 1                                               | 3                                                               |
|                 | 6                | 1                                       | 1                                               | 0                                                               |                 | 2                | 8                                       | 1                                               | 7                                                               |
| 4               | 1                | 4                                       | 4                                               | 0                                                               | 4               | 3                | 5                                       | 0                                               | 5                                                               |
|                 | 2                | 5                                       | 5                                               | 0                                                               |                 | 4                | 3                                       | 0                                               | 3                                                               |
|                 | 3                | 3                                       | 3                                               | 0                                                               |                 | 5                | 2                                       | 0                                               | 2                                                               |
|                 | 4                | 2                                       | 2                                               | 0                                                               |                 | 1                | 3                                       | 0                                               | 3                                                               |
|                 | 5                | 4                                       | 4                                               | 0                                                               |                 | 2                | 4                                       | 0                                               | 4                                                               |
| 5               | 1                | 5                                       | 5                                               | 0                                                               | 5               | 3                | 2                                       | 0                                               | 2                                                               |
|                 | 2                | 6                                       | 6                                               | 0                                                               |                 | 4                | 1                                       | 0                                               | 1                                                               |
|                 | 3                | 5                                       | 5                                               | 0                                                               |                 | 1                | 4                                       | 0                                               | 4                                                               |
|                 | 4                | 3                                       | 3                                               | 0                                                               |                 | 2                | 5                                       | 0                                               | 5                                                               |
|                 | 5                | 4                                       | 4                                               | 0                                                               |                 | 3                | 4                                       | 1                                               | 3                                                               |
|                 |                  |                                         |                                                 |                                                                 |                 | 4                | 0                                       | 4                                               |                                                                 |
|                 |                  |                                         |                                                 |                                                                 |                 | 5                | 0                                       | 5                                               |                                                                 |
|                 |                  |                                         |                                                 |                                                                 |                 | 6                | 1                                       | 3                                               |                                                                 |
|                 |                  |                                         |                                                 |                                                                 |                 | 4                | 0                                       | 2                                               |                                                                 |
|                 |                  |                                         |                                                 |                                                                 |                 | 5                | 0                                       | 3                                               |                                                                 |
|                 |                  |                                         |                                                 |                                                                 |                 | 6                | 1                                       | 1                                               |                                                                 |

|                                                                   |    |            |   |     |       |       |
|-------------------------------------------------------------------|----|------------|---|-----|-------|-------|
| Number of neurons examined                                        | 91 | 91         | 0 | 103 | 6     | 97    |
| Percent of MO-containing neurons with two or short/no protrusions |    | 100        | 0 |     | 5.83  | 94.2  |
| Standard Deviation                                                |    | 1.49       | 0 |     | 0.430 | 1.64  |
| SEM                                                               |    | 0.156      |   |     | 0.175 | 0.166 |
| Unpaired student's t test                                         |    | 1.8074E-14 |   |     |       |       |
