# Supplementary material
Source: PubMed Central journal article supplement (PMC5416810)
Supplement: NIHMS861317-supplement-5.pdf [file NIHMS861317-supplement-5.pdf]

**Supplementary Table 4. Sensory neurons overexpressing Annexin A6 exhibit a bipolar morphology and extra protrusions.**

| pCIG     |           |                |              | pCIG-Annexin A6 |           |                |                 |
|----------|-----------|----------------|--------------|-----------------|-----------|----------------|-----------------|
| Ganglion | Section # | Number of      | Number of    | Ganglion        | Section # | Number of      | Number of       |
|          |           | electroporated | bipolar      |                 |           | electroporated | bipolar neurons |
|          |           | bipolar        | neurons with |                 |           | bipolar        | with extra      |
|          |           | neurons        | extra        |                 |           | neurons        | protrusions     |
|          |           |                | protrusions  |                 |           |                |                 |
| 1        | 1         | 9              | 0            | 1               | 1         | 19             | 9               |
|          | 2         | 11             | 0            |                 | 2         | 20             | 8               |
|          | 3         | 8              | 0            |                 | 3         | 6              | 2               |
|          | 4         | 13             | 0            |                 | 4         | 25             | 6               |
| 2        | 1         | 9              | 0            |                 | 5         | 22             | 8               |
|          | 2         | 11             | 0            |                 | 6         | 18             | 10              |
|          | 3         | 12             | 0            |                 | 7         | 23             | 9               |
|          | 4         | 12             | 0            | 2               | 1         | 6              | 1               |
|          | 5         | 5              | 0            |                 | 2         | 7              | 0               |
|          | 6         | 7              | 0            |                 | 3         | 9              | 2               |
| 3        | 1         | 7              | 0            |                 | 4         | 8              | 1               |
|          | 2         | 10             | 0            | 5               | 7         | 0              |                 |
|          | 3         | 7              | 0            | 6               | 4         | 0              |                 |
|          | 4         | 11             | 0            | 3               | 1         | 8              | 3               |
|          | 5         | 7              | 0            |                 | 2         | 6              | 3               |
| 4        | 1         | 5              | 0            |                 | 3         | 9              | 4               |
|          | 2         | 14             | 0            | 4               | 7         | 3              |                 |
|          | 3         | 13             | 0            | 4               | 1         | 12             | 4               |
|          | 4         | 9              | 0            |                 | 2         | 11             | 4               |
| 5        | 1         | 15             | 0            |                 | 3         | 4              | 1               |
|          | 2         | 13             | 0            |                 | 4         | 4              | 1               |
|          | 3         | 8              | 0            | 5               | 1         | 22             | 9               |
|          | 4         | 12             | 0            |                 | 2         | 20             | 8               |
|          | 5         | 11             | 0            |                 | 3         | 13             | 5               |
|          | 6         | 4              | 0            |                 | 4         | 8              | 2               |
|          | 7         | 9              | 0            |                 |           |                |                 |

|                                           |          |     |   |   |   |     |       |
|-------------------------------------------|----------|-----|---|---|---|-----|-------|
|                                           |          |     |   | 6 | 1 | 14  | 6     |
| 6                                         | 1        | 8   | 0 |   | 2 | 18  | 9     |
|                                           | 2        | 7   | 0 |   | 3 | 10  | 4     |
|                                           | 3        | 5   | 0 |   | 4 | 8   | 3     |
|                                           | 4        | 8   | 0 |   | 5 | 6   | 2     |
|                                           | 5        | 13  | 0 |   |   |     |       |
|                                           | 6        | 8   | 0 | 7 | 1 | 9   | 3     |
|                                           |          |     |   |   | 2 | 8   | 2     |
| 7                                         | 1        | 7   | 0 |   | 3 | 6   | 1     |
|                                           | 2        | 11  | 0 |   | 4 | 9   | 3     |
|                                           | 3        | 10  | 0 |   | 5 | 6   | 2     |
|                                           | 4        | 8   | 0 |   |   |     |       |
| Number of neurons examined                |          | 337 | 0 |   |   | 392 | 138   |
| Percent of neurons with extra protrusions |          |     | 0 |   |   |     | 35.2  |
| Standard Deviation                        |          |     | 0 |   |   |     | 3.05  |
| SEM                                       |          |     |   |   |   |     | 0.259 |
| Unpaired student's t test                 | 5.42E-11 |     |   |   |   |     |       |
