# Supplementary material
Source: PubMed Central journal article supplement (PMC5416810)
Supplement: NIHMS861317-supplement-6.pdf [file NIHMS861317-supplement-6.pdf]

**Supplementary Table 5. Placode-cell derived neurons show no change in cell death and cell division upon perturbation of Annexin A6.**

|                 |                  |                                              |                                            |                                              | Knockdown TUNEL |                  |                                              |                                            |                                              |  |
|-----------------|------------------|----------------------------------------------|--------------------------------------------|----------------------------------------------|-----------------|------------------|----------------------------------------------|--------------------------------------------|----------------------------------------------|--|
|                 |                  |                                              |                                            |                                              | Control MO      |                  | Annexin A6 MO                                |                                            |                                              |  |
| <u>Ganglion</u> | <u>Section #</u> | <u>Number of electroporated (EP) neurons</u> | <u>Number of TUNEL-positive EP neurons</u> | <u>Number of TUNEL-positive non-EP cells</u> | <u>Ganglion</u> | <u>Section #</u> | <u>Number of electroporated (EP) neurons</u> | <u>Number of TUNEL-positive EP neurons</u> | <u>Number of TUNEL-positive non-EP cells</u> |  |
| 1               | 1                | 40                                           | 0                                          | 9                                            | 1               | 1                | 6                                            | 0                                          | 3                                            |  |
|                 | 2                | 39                                           | 0                                          | 12                                           |                 | 2                | 9                                            | 0                                          | 4                                            |  |
|                 | 3                | 45                                           | 0                                          | 8                                            |                 | 3                | 8                                            | 0                                          | 5                                            |  |
|                 | 4                | 34                                           | 0                                          | 10                                           |                 | 4                | 5                                            | 0                                          | 6                                            |  |
|                 | 5                | 36                                           | 1                                          | 12                                           |                 | 5                | 9                                            | 0                                          | 7                                            |  |
|                 | 6                | 55                                           | 0                                          | 15                                           |                 |                  |                                              |                                            |                                              |  |
| 2               |                  |                                              |                                            |                                              | 2               | 1                | 40                                           | 1                                          | 15                                           |  |
|                 | 1                | 3                                            | 0                                          | 8                                            |                 | 2                | 46                                           | 0                                          | 14                                           |  |
|                 | 2                | 10                                           | 1                                          | 12                                           |                 | 3                | 30                                           | 1                                          | 14                                           |  |
|                 | 3                | 9                                            | 0                                          | 13                                           |                 | 4                | 30                                           | 0                                          | 17                                           |  |
|                 | 4                | 10                                           | 0                                          | 7                                            |                 | 5                | 38                                           | 1                                          | 19                                           |  |
|                 | 5                | 13                                           | 0                                          | 5                                            |                 | 6                | 35                                           | 0                                          | 20                                           |  |
|                 | 6                | 14                                           | 1                                          | 5                                            |                 |                  |                                              |                                            |                                              |  |
|                 | 7                | 14                                           | 0                                          | 6                                            | 3               | 1                | 26                                           | 0                                          | 12                                           |  |
|                 |                  |                                              |                                            |                                              |                 | 2                | 35                                           | 0                                          | 10                                           |  |
|                 |                  |                                              |                                            |                                              |                 | 3                | 33                                           | 0                                          | 9                                            |  |
| 3               | 1                | 38                                           | 0                                          | 28                                           | 4               | 4                | 35                                           | 0                                          | 8                                            |  |
|                 | 2                | 35                                           | 1                                          | 25                                           |                 | 5                | 40                                           | 0                                          | 5                                            |  |
|                 | 3                | 36                                           | 0                                          | 26                                           |                 |                  |                                              |                                            |                                              |  |
|                 | 4                | 30                                           | 1                                          | 20                                           |                 |                  |                                              |                                            |                                              |  |
|                 | 5                | 39                                           | 0                                          | 19                                           |                 |                  |                                              |                                            |                                              |  |
| 4               |                  |                                              |                                            |                                              | 4               | 1                | 40                                           | 1                                          | 16                                           |  |
|                 | 1                | 36                                           | 0                                          | 15                                           |                 | 2                | 45                                           | 1                                          | 14                                           |  |
|                 | 2                | 35                                           | 0                                          | 15                                           |                 | 3                | 43                                           | 1                                          | 18                                           |  |
|                 | 3                | 30                                           | 0                                          | 18                                           | 5               | 4                | 40                                           | 0                                          | 19                                           |  |
|                 | 4                | 32                                           | 0                                          | 17                                           |                 | 5                | 29                                           | 0                                          | 14                                           |  |
|                 | 5                | 28                                           | 0                                          | 12                                           |                 |                  |                                              |                                            |                                              |  |
|                 | 6                | 25                                           | 0                                          | 14                                           |                 |                  |                                              |                                            |                                              |  |
|                 |                  |                                              |                                            |                                              | 5               | 1                | 45                                           | 1                                          | 15                                           |  |
|                 |                  |                                              |                                            |                                              |                 | 2                | 47                                           | 0                                          | 14                                           |  |
|                 |                  |                                              |                                            |                                              |                 | 3                | 46                                           | 1                                          | 19                                           |  |

|                                        |   |     |       |     |   |     |       |     |
|----------------------------------------|---|-----|-------|-----|---|-----|-------|-----|
| 5                                      | 1 | 5   | 0     | 8   | 4 | 45  | 1     | 25  |
|                                        | 2 | 5   | 0     | 9   | 5 | 49  | 1     | 21  |
|                                        | 3 | 6   | 0     | 7   | 6 | 40  | 0     | 22  |
|                                        | 4 | 4   | 0     | 6   |   |     |       |     |
|                                        | 5 | 5   | 1     | 10  |   |     |       |     |
|                                        | 6 | 5   | 0     | 5   |   |     |       |     |
| Number of neurons examined             |   | 716 | 6     | 376 |   | 894 | 10    | 365 |
| Percent of EP cells positive for TUNEL |   |     | 0.838 |     |   |     | 1.12  |     |
| Standard Deviation                     |   |     | 0.407 |     |   |     | 0.492 |     |
| SEM                                    |   |     | 0.166 |     |   |     | 0.156 |     |
| Unpaired student's t test              |   |     | 0.158 |     |   |     |       |     |

### Overexpression TUNEL

| Ganglion | Section # | pCIG                                  |                                     |                                       | Ganglion | Section # | pCIG-Annexin A6                       |                                     |                                       |
|----------|-----------|---------------------------------------|-------------------------------------|---------------------------------------|----------|-----------|---------------------------------------|-------------------------------------|---------------------------------------|
|          |           | Number of electroporated (EP) neurons | Number of TUNEL-positive EP neurons | Number of TUNEL-positive non-EP cells |          |           | Number of electroporated (EP) neurons | Number of TUNEL-positive EP neurons | Number of TUNEL-positive non-EP cells |
| 1        | 1         | 17                                    | 0                                   | 5                                     | 1        | 1         | 10                                    | 0                                   | 3                                     |
|          | 2         | 19                                    | 0                                   | 7                                     |          | 2         | 8                                     | 0                                   | 4                                     |
|          | 3         | 19                                    | 0                                   | 7                                     |          | 3         | 9                                     | 0                                   | 7                                     |
|          | 4         | 15                                    | 0                                   | 8                                     |          | 4         | 9                                     | 0                                   | 6                                     |
|          | 5         | 19                                    | 0                                   | 6                                     |          | 5         | 7                                     | 0                                   | 8                                     |
| 2        | 1         | 23                                    | 0                                   | 19                                    | 2        | 1         | 9                                     | 0                                   | 7                                     |
|          | 2         | 26                                    | 0                                   | 15                                    |          | 2         | 7                                     | 0                                   | 9                                     |
|          | 3         | 23                                    | 0                                   | 20                                    |          | 3         | 10                                    | 0                                   | 5                                     |
|          | 4         | 23                                    | 1                                   | 19                                    |          | 4         | 8                                     | 0                                   | 9                                     |
|          | 5         | 22                                    | 0                                   | 8                                     |          | 5         | 9                                     | 0                                   | 8                                     |
|          | 6         |                                       |                                     |                                       |          | 6         | 9                                     | 0                                   | 8                                     |
| 3        | 1         | 16                                    | 0                                   | 14                                    | 3        | 1         | 24                                    | 0                                   | 18                                    |
|          | 2         | 16                                    | 0                                   | 8                                     |          | 2         | 22                                    | 0                                   | 14                                    |
|          | 3         | 17                                    | 0                                   | 9                                     |          |           |                                       |                                     |                                       |

|                                        |   |     |       |     |   |   |     |   |     |
|----------------------------------------|---|-----|-------|-----|---|---|-----|---|-----|
|                                        | 4 | 15  | 0     | 7   |   | 3 | 25  | 0 | 12  |
|                                        | 5 | 18  | 0     | 10  |   | 4 | 24  | 0 | 13  |
|                                        |   |     |       |     |   | 5 | 26  | 0 | 17  |
| 4                                      | 1 | 23  | 0     | 7   |   |   |     |   |     |
|                                        | 2 | 20  | 0     | 8   | 4 | 1 | 24  | 0 | 16  |
|                                        | 3 | 22  | 0     | 5   |   | 2 | 21  | 0 | 10  |
|                                        | 4 | 21  | 0     | 6   |   | 3 | 25  | 0 | 9   |
|                                        | 5 | 22  | 0     | 3   |   | 4 | 20  | 0 | 9   |
|                                        |   |     |       |     |   | 5 | 22  | 0 | 7   |
| 5                                      | 1 | 15  | 0     | 7   |   |   |     |   |     |
|                                        | 2 | 20  | 0     | 5   | 5 | 1 | 24  | 0 | 5   |
|                                        | 3 | 21  | 0     | 4   |   | 2 | 25  | 0 | 4   |
|                                        | 4 | 23  | 0     | 4   |   | 3 | 22  | 0 | 7   |
|                                        | 5 | 19  | 0     | 6   |   | 4 | 23  | 0 | 8   |
|                                        | 6 | 20  | 0     | 3   |   | 5 | 26  | 0 | 9   |
|                                        |   |     |       |     |   | 6 | 25  | 0 | 5   |
| Number of neurons examined             |   | 514 | 1     | 220 |   |   | 473 | 0 | 237 |
| Percent of EP cells positive for TUNEL |   |     | 0.195 |     |   |   |     | 0 |     |
| Standard Deviation                     |   |     | 0.196 |     |   |   |     |   |     |
| SEM                                    |   |     | 0.196 |     |   |   |     |   |     |
| Unpaired student's t test              |   |     | 0.313 |     |   |   |     |   |     |

**Knockdown PH3**

**Control MO**

**Annexin A6 MO**

| <u>Ganglion</u> | <u>Section #</u> | <u>Number of electroporated (EP) neurons</u> | <u>Number of PH3-positive EP neurons</u> | <u>Number of PH3-positive non-EP cells</u> | <u>Ganglion</u> | <u>Section #</u> | <u>Number of electroporated (EP) neurons</u> | <u>Number of PH3-positive EP neurons</u> | <u>Number of PH3-positive non-EP cells</u> |
|-----------------|------------------|----------------------------------------------|------------------------------------------|--------------------------------------------|-----------------|------------------|----------------------------------------------|------------------------------------------|--------------------------------------------|
| 1               | 1                | 22                                           | 0                                        | 9                                          | 1               | 1                | 9                                            | 0                                        | 9                                          |
|                 | 2                | 23                                           | 0                                        | 8                                          |                 | 2                | 12                                           | 0                                        | 8                                          |
|                 | 3                | 20                                           | 0                                        | 15                                         |                 | 3                | 12                                           | 0                                        | 5                                          |
|                 | 4                | 18                                           | 0                                        | 14                                         |                 | 4                | 14                                           | 0                                        | 6                                          |
|                 | 5                | 23                                           | 1                                        | 10                                         |                 | 5                | 14                                           | 0                                        | 3                                          |
| 2               | 1                | 23                                           | 0                                        | 18                                         | 2               | 1                | 30                                           | 1                                        | 12                                         |
|                 | 2                | 29                                           | 1                                        | 12                                         |                 | 2                | 35                                           | 0                                        | 17                                         |
|                 | 3                | 30                                           | 0                                        | 13                                         |                 | 3                | 25                                           | 1                                        | 12                                         |
|                 | 4                | 33                                           | 0                                        | 17                                         |                 | 4                | 29                                           | 0                                        | 13                                         |
|                 | 5                | 35                                           | 0                                        | 25                                         |                 | 5                | 27                                           | 1                                        | 16                                         |
|                 | 6                | 31                                           | 0                                        | 14                                         |                 | 6                | 26                                           | 0                                        | 11                                         |
| 3               | 1                | 28                                           | 0                                        | 11                                         | 3               | 1                | 26                                           | 0                                        | 5                                          |
|                 | 2                | 26                                           | 1                                        | 14                                         |                 | 2                | 21                                           | 0                                        | 8                                          |
|                 | 3                | 25                                           | 0                                        | 18                                         |                 | 3                | 21                                           | 0                                        | 9                                          |
|                 | 4                | 24                                           | 1                                        | 15                                         |                 | 4                | 20                                           | 0                                        | 8                                          |
|                 | 5                | 22                                           | 0                                        | 20                                         |                 | 5                | 19                                           | 0                                        | 5                                          |
| 4               | 1                | 30                                           | 0                                        | 11                                         | 4               | 1                | 27                                           | 0                                        | 18                                         |
|                 | 2                | 30                                           | 0                                        | 9                                          |                 | 2                | 28                                           | 1                                        | 15                                         |
|                 | 3                | 21                                           | 0                                        | 12                                         |                 | 3                | 26                                           | 1                                        | 6                                          |
|                 | 4                | 25                                           | 0                                        | 14                                         |                 | 4                | 35                                           | 0                                        | 9                                          |
|                 | 5                | 26                                           | 0                                        | 7                                          |                 | 5                | 29                                           | 0                                        | 7                                          |
|                 | 6                | 28                                           | 0                                        | 13                                         |                 |                  |                                              |                                          |                                            |
| 5               |                  |                                              |                                          |                                            | 5               | 1                | 39                                           | 1                                        | 25                                         |
|                 | 1                | 10                                           | 0                                        | 7                                          |                 | 2                | 39                                           | 0                                        | 25                                         |
|                 | 2                | 12                                           | 0                                        | 8                                          |                 | 3                | 34                                           | 0                                        | 24                                         |
|                 | 3                | 13                                           | 0                                        | 9                                          |                 | 4                | 40                                           | 0                                        | 21                                         |
|                 | 4                | 14                                           | 0                                        | 12                                         |                 | 5                | 47                                           | 1                                        | 20                                         |

|                                      |     |       |     |   |     |       |     |    |
|--------------------------------------|-----|-------|-----|---|-----|-------|-----|----|
|                                      | 5   | 15    | 1   | 7 | 6   | 40    | 0   | 22 |
| Number of neurons examined           | 636 | 5     | 342 |   | 724 | 7     | 339 |    |
| Percent of EP cells positive for PH3 |     | 0.786 |     |   |     | 0.967 |     |    |
| Standard Deviation                   |     | 0.396 |     |   |     | 0.447 |     |    |
| SEM                                  |     | 0.177 |     |   |     | 0.169 |     |    |
| Unpaired student's t test            |     | 0.522 |     |   |     |       |     |    |

| Overexpression PH3 |                  |                                              |                                          |                                            |                 |                  |                                              |                                          |                                            |
|--------------------|------------------|----------------------------------------------|------------------------------------------|--------------------------------------------|-----------------|------------------|----------------------------------------------|------------------------------------------|--------------------------------------------|
| pCIG               |                  |                                              |                                          |                                            | pCIG-Annexin A6 |                  |                                              |                                          |                                            |
| <u>Ganglion</u>    | <u>Section #</u> | <u>Number of electroporated (EP) neurons</u> | <u>Number of PH3-positive EP neurons</u> | <u>Number of PH3-positive non-EP cells</u> | <u>Ganglion</u> | <u>Section #</u> | <u>Number of electroporated (EP) neurons</u> | <u>Number of PH3-positive EP neurons</u> | <u>Number of PH3-positive non-EP cells</u> |
| 1                  | 1                | 22                                           | 0                                        | 14                                         | 1               | 1                | 10                                           | 0                                        | 8                                          |
|                    | 2                | 23                                           | 0                                        | 12                                         |                 | 2                | 18                                           | 0                                        | 7                                          |
|                    | 3                | 26                                           | 0                                        | 14                                         |                 | 3                | 21                                           | 0                                        | 14                                         |
|                    | 4                | 28                                           | 0                                        | 17                                         |                 | 4                | 14                                           | 0                                        | 12                                         |
|                    | 5                | 20                                           | 0                                        | 10                                         |                 | 5                | 19                                           | 0                                        | 10                                         |
| 2                  | 1                | 18                                           | 0                                        | 5                                          | 2               | 1                | 14                                           | 0                                        | 14                                         |
|                    | 2                | 16                                           | 0                                        | 4                                          |                 | 2                | 15                                           | 0                                        | 16                                         |
|                    | 3                | 15                                           | 0                                        | 2                                          |                 | 3                | 10                                           | 0                                        | 13                                         |
|                    | 4                | 14                                           | 1                                        | 6                                          |                 | 4                | 8                                            | 0                                        | 11                                         |
|                    | 5                | 19                                           | 0                                        | 8                                          |                 | 5                | 16                                           | 0                                        | 12                                         |
| 3                  | 1                | 6                                            | 0                                        | 14                                         | 3               | 1                | 20                                           | 0                                        | 12                                         |
|                    | 2                | 8                                            | 0                                        | 12                                         |                 | 2                | 21                                           | 0                                        | 11                                         |
|                    | 3                | 7                                            | 0                                        | 15                                         |                 | 3                | 25                                           | 0                                        | 13                                         |
|                    | 4                | 9                                            | 0                                        | 14                                         |                 | 4                | 22                                           | 0                                        | 13                                         |
|                    | 5                | 5                                            | 0                                        | 7                                          |                 | 5                | 26                                           | 0                                        | 12                                         |
| 4                  | 1                | 13                                           | 0                                        | 7                                          |                 |                  |                                              |                                          |                                            |

|                                      |   |     |       |     |   |   |     |   |     |
|--------------------------------------|---|-----|-------|-----|---|---|-----|---|-----|
|                                      | 2 | 12  | 0     | 9   | 4 | 1 | 23  | 0 | 12  |
|                                      | 3 | 14  | 0     | 5   |   | 2 | 22  | 0 | 11  |
|                                      | 4 | 17  | 0     | 8   |   | 3 | 24  | 0 | 9   |
|                                      | 5 | 20  | 0     | 7   |   | 4 | 26  | 0 | 9   |
|                                      |   |     |       |     |   | 5 | 22  | 0 | 17  |
| 5                                    | 1 | 5   | 0     | 8   |   |   |     |   |     |
|                                      | 2 | 6   | 0     | 9   | 5 | 1 | 40  | 0 | 18  |
|                                      | 3 | 9   | 0     | 6   |   | 2 | 36  | 0 | 19  |
|                                      | 4 | 11  | 0     | 4   |   | 3 | 33  | 0 | 10  |
|                                      | 5 | 12  | 0     | 6   |   | 4 | 26  | 0 | 13  |
|                                      | 6 | 8   | 0     | 12  |   | 5 | 24  | 0 | 15  |
| Number of neurons<br>examined        |   | 363 | 1     | 235 |   |   | 546 | 0 | 322 |
| Percent of EP cells positive for PH3 |   |     | 0.275 |     |   |   |     | 0 |     |
| Standard Deviation                   |   |     | 0.196 |     |   |   |     | 0 |     |
| SEM                                  |   |     | 0.196 |     |   |   |     |   |     |
| Unpaired student's t test            |   |     | 0.322 |     |   |   |     |   |     |
